# Supplementary material
Source: PubMed Central journal article supplement (PMC3993402)
Supplement: IAI.01089-13_zii999090602so1.pdf [file IAI.01089-13_zii999090602so1.pdf]

Supplementary Figure 1. Yamamoto et al.

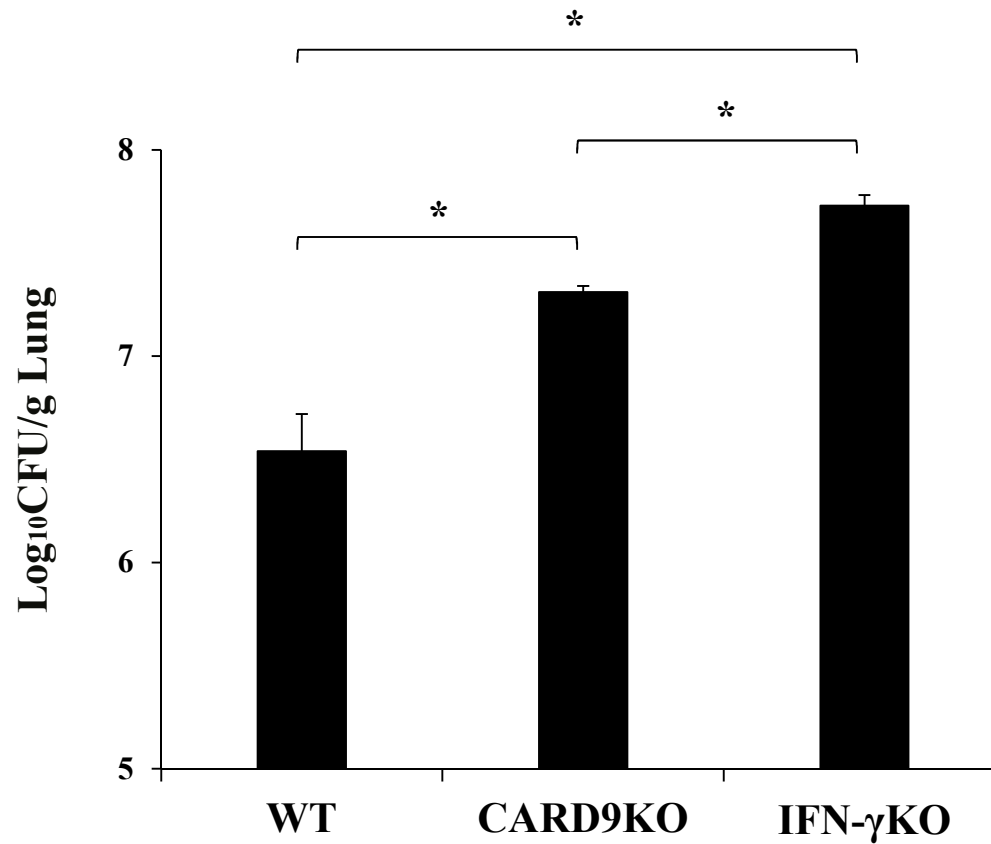

**Supplementary Figure 1. *C. neoformans* infection in CARD9KO and IFN- $\gamma$ KO mice**

WT, CARD9KO and IFN- $\gamma$ KO (J. Immunol. 159: 1418-1428, 1997) mice were infected intratracheally with *C. neoformans*. The number of live colonies in lungs was counted on day 14 after infection. Each column represents the mean  $\pm$  SD of five mice. \* $p$  < 0.05.
